# Supplementary material for: Chromatin states shape insertion profiles of the piggyBac, Tol2 and Sleeping Beauty transposons and murine leukemia virus
Source: PubMed Central journal article supplement (PMC5333637; doi:10.1038/srep43613), 2017-03-02
Supplement: srep43613-s1.pdf [file srep43613-s1.pdf]

## Supplementary Information

### **Chromatin states shape insertion profiles of the piggyBac, Tol2 and Sleeping Beauty transposons and murine leukemia virus**

**Junko Yoshida, Keiko Akagi, Ryo Misawa, Chikara Kokubu, Junji Takeda and Kyoji Horie**

Supplementary Table S1. Consideration for the determination of vector insertion sites.

Supplementary Table S2. Processing of Roche GS FLX reads and the number of mapped loci.

Supplementary Table S3. Processing of Illumina GA2 reads and the number of mapped loci.

Supplementary Table S4. Vector comparison of inter-insertion distance.

Supplementary Table S5. Vector comparison of hotspot insertion frequency.

Supplementary Table S6. Vector comparison of enrichment inside the highest expressed genes.

Supplementary Table S7. Vector comparison of insertions into enhancer and super-enhancer regions.

Supplementary Table S8. Vector comparison of insertions at histone-modified regions.

Supplementary Table S9. Vector comparison of insertions at the binding sites of regulatory proteins.

Supplementary Table S10. Comparison of the findings between previous studies and the current study.

Supplementary Table S11. Oligonucleotides for splinkerette-PCR and sequencing of vector insertion sites.

Supplementary Fig. S1. Copy number of vector DNA in G418-resistant and -sensitive clones.

Supplementary Fig. S2. Genome-wide distribution of vector insertion sites.

Supplementary Fig. S3. Grouping of genomic regions by exon density.

Supplementary Fig. S4. UCSC genome browser view of a PB insertion hotspot.

Supplementary Fig. S5. Comparison between with and without G418 selection analysed with Roche GS FLX.

Supplementary Fig. S6. Insertion preference of PB and Tol2 analyzed with Illumina GA2.

**Supplementary Table S1. Consideration for the determination of vector insertion sites**

| <b>Factors contributing to bias</b>                                   | <b>Solution</b>                                          |
|-----------------------------------------------------------------------|----------------------------------------------------------|
| 1. Small dataset size                                                 | High-throughput sequencing<br>Roche GS FLX, Illumina GA2 |
| 2. Transcriptional silencing of the neo gene                          | Multiple vector insertion<br>No G418 selection           |
| 3. Local hopping of DNA transposons                                   | Independent transfections                                |
| 4. Consensus target sequence<br>piggyBac: TTAA<br>Sleeping Beauty: TA | <i>In silico</i> control                                 |
| 5. Distribution of restriction sites                                  | <i>In silico</i> control<br>Sonication                   |

**Supplementary Table S2. Processing of Roche GS FLX reads and the number of mapped loci**

| Vector | Expt. <sup>a</sup> | G418 selection | Raw reads |        | Processed reads <sup>b</sup> |                |        | Mapped loci <sup>c</sup> |                      |
|--------|--------------------|----------------|-----------|--------|------------------------------|----------------|--------|--------------------------|----------------------|
|        |                    |                | count     | count  | %valid                       | mean size (bp) | stddev | count                    | loci/processed reads |
| MLV    | 1                  | +              | 3,998     | 3,179  | 79.51%                       | 67.02          | 23.75  | 1,673                    | 52.63%               |
|        | 2                  | +              | 2,188     | 1,870  | 85.47%                       | 67.07          | 20.34  | 1,090                    | 58.29%               |
|        | 3                  | +              | 9,352     | 6,594  | 70.51%                       | 67.83          | 24.01  | 3,131                    | 47.48%               |
| Total  |                    |                | 15,538    | 11,643 | 74.93%                       |                |        | 5,894                    | 50.62%               |
| PB     | 1                  | +              | 6,091     | 4,809  | 78.95%                       | 117.62         | 66.76  | 2,194                    | 45.62%               |
|        | 2                  | +              | 7,794     | 5,473  | 70.22%                       | 119.85         | 68.57  | 2,464                    | 45.02%               |
|        | 3                  | +              | 4,530     | 3,605  | 79.58%                       | 125.27         | 68.67  | 1,710                    | 47.43%               |
| Total  |                    |                | 18,415    | 13,887 | 75.41%                       |                |        | 6,368                    | 45.86%               |
| Tol2   | 1                  | +              | 4,518     | 2,777  | 61.47%                       | 111.02         | 48.25  | 1,929                    | 69.46%               |
|        | 2                  | +              | 4,804     | 2,433  | 50.65%                       | 90.38          | 43.29  | 1,624                    | 66.75%               |
|        | 3                  | +              | 2,056     | 1,268  | 61.67%                       | 98.73          | 43.08  | 886                      | 69.87%               |
| Total  |                    |                | 11,378    | 6,478  | 56.93%                       |                |        | 4,439                    | 68.52%               |
| SB     | 1                  | +              | 6,941     | 5,425  | 78.16%                       | 134.55         | 73.6   | 3,040                    | 56.04%               |
|        | 2                  | +              | 5,863     | 4,543  | 77.49%                       | 134.97         | 70.21  | 2,603                    | 57.30%               |
|        | 3                  | +              | 6,514     | 5,241  | 80.46%                       | 135.94         | 70.54  | 2,998                    | 57.20%               |
| Total  |                    |                | 19,318    | 15,209 | 78.73%                       |                |        | 8,641                    | 56.82%               |
| MLV    | 1                  | -              | 7,511     | 5,201  | 69.25%                       | 158.52         | 84.31  | 2,072                    | 39.84%               |
|        | 2                  | -              | 7,729     | 4,982  | 64.46%                       | 160.73         | 84.96  | 2,053                    | 41.21%               |
|        | 3                  | -              | 6,167     | 4,077  | 66.11%                       | 156.05         | 79.89  | 1,705                    | 41.82%               |
| Total  |                    |                | 21,407    | 14,260 | 66.61%                       |                |        | 5,830                    | 40.88%               |
| PB     | 1                  | -              | 7,317     | 4,389  | 59.98%                       | 140.25         | 91.08  | 1,536                    | 35.00%               |
|        | 2                  | -              | 9,699     | 4,366  | 45.01%                       | 155.42         | 97.59  | 1,285                    | 29.43%               |
|        | 3                  | -              | 9,516     | 4,786  | 50.29%                       | 144.88         | 94.56  | 1,538                    | 32.14%               |
| Total  |                    |                | 26,532    | 13,541 | 51.04%                       |                |        | 4,359                    | 32.19%               |

<sup>a</sup> Expt. 1-3 indicate three independent transfections.

<sup>b</sup> Vector- and adaptor-derived sequences were trimmed.

<sup>c</sup> Mapping was conducted by BLAT search using mm8 mouse genome assembly as a reference. In case multiple reads were mapped at the same coordinate, this was regarded as a single insertion event.

**Supplementary Table S3. Processing of Illumina GA2 reads and the number of mapped loci**

| Vector | Cell type                | Raw reads  | Processed reads <sup>a</sup> | Aligned reads <sup>b</sup><br>(Q>30) | Mapped loci <sup>c</sup> |
|--------|--------------------------|------------|------------------------------|--------------------------------------|--------------------------|
| Tol2   | <i>Wt</i>                | 24,999,311 | 7,427,316                    | 4,839,750                            | 6,594                    |
| PB     | <i>Wt</i>                | 33,347,781 | 12,493,839                   | 2,796,459                            | 3,261                    |
| Tol2   | <i>Eed<sup>m/m</sup></i> | 25,284,729 | 737,563                      | 98,555                               | 3,016                    |
| PB     | <i>Eed<sup>m/m</sup></i> | 27,369,650 | 1,307,017                    | 601,726                              | 2,868                    |

<sup>a</sup>Vector and linker sequences were trimmed off. For Tol2, reads with sequence mean base quality > 30 were selected using Trimmomatic. This process was not conducted for PB because the presence of the consensus target sequence (TTAA) at the insertion sites could be used for sequence-quality checks in the downstream analysis.

<sup>b</sup>Reads were aligned by BWA aligner against mouse genome assembly mm8, and only the reads with alignment quality > 30 were used for further analysis. For PB, only the reads with the consensus target sequence were selected.

<sup>c</sup>Because most of the insertion site sequences should be duplicated by PCR, we used alignments supported by two or more reads using BEDTools. Multiple reads mapped at the same coordinate were regarded as a single insertion event.

**Supplementary Table S4. Vector comparison of inter-insertion distance**

| Vector1 | Fraction of inter-insertion distance < 10kb (vector1) | Vector2 | Fraction of inter-insertion distance < 10kb (vector2) | Ratio | Number of trials | Number of cases of vector1 < vector2 | P-value | Significance |
|---------|-------------------------------------------------------|---------|-------------------------------------------------------|-------|------------------|--------------------------------------|---------|--------------|
| MLV     | 16.93%                                                | PB      | 5.71%                                                 | 2.97  | 1000             | 0                                    | <0.001  | *            |
| MLV     | 16.93%                                                | Tol2    | 4.95%                                                 | 3.42  | 1000             | 0                                    | <0.001  | *            |
| MLV     | 16.93%                                                | SB      | 2.58%                                                 | 6.57  | 1000             | 0                                    | <0.001  | *            |
| PB      | 5.71%                                                 | Tol2    | 4.95%                                                 | 1.15  | 1000             | 0                                    | <0.001  | *            |
| PB      | 5.71%                                                 | SB      | 2.58%                                                 | 2.22  | 1000             | 0                                    | <0.001  | *            |
| Tol2    | 4.95%                                                 | SB      | 2.58%                                                 | 1.92  | 1000             | 0                                    | <0.001  | *            |

P-values were calculated by bootstrapping.

\*P<0.05.

**Supplementary Table S5. Vector comparison of hotspot insertion frequency**

| Hit type       | Vector1 | Mean number of hotspots in vector1 | Vector2 | Mean number of hotspots in vector2 | Ratio (vector1/vector2) | Number of trials | Number of cases of vector1 < vector2 | P-value | Adjusted P-value | Significance |
|----------------|---------|------------------------------------|---------|------------------------------------|-------------------------|------------------|--------------------------------------|---------|------------------|--------------|
| 2-hits         | MLV     | 790.23                             | PB      | 427.58                             | 1.85                    | 1000             | 0                                    | <0.001  | <0.001           | *            |
| 2-hits         | MLV     | 790.23                             | Tol2    | 415.96                             | 1.90                    | 1000             | 0                                    | <0.001  | <0.001           | *            |
| 2-hits         | MLV     | 790.23                             | SB      | 273.98                             | 2.88                    | 1000             | 0                                    | <0.001  | <0.001           | *            |
| 2-hits         | PB      | 427.58                             | Tol2    | 415.96                             | 1.03                    | 1000             | 52                                   | 0.052   | 0.052            |              |
| 2-hits         | PB      | 427.58                             | SB      | 273.98                             | 1.56                    | 1000             | 0                                    | <0.001  | <0.001           | *            |
| 2-hits         | Tol2    | 415.96                             | SB      | 273.98                             | 1.52                    | 1000             | 0                                    | <0.001  | <0.001           | *            |
| 3-hits         | MLV     | 293.80                             | PB      | 96.31                              | 3.05                    | 1000             | 0                                    | <0.001  | <0.001           | *            |
| 3-hits         | MLV     | 293.80                             | Tol2    | 75.27                              | 3.90                    | 1000             | 0                                    | <0.001  | <0.001           | *            |
| 3-hits         | MLV     | 293.80                             | SB      | 31.03                              | 9.47                    | 1000             | 0                                    | <0.001  | <0.001           | *            |
| 3-hits         | PB      | 96.31                              | Tol2    | 75.27                              | 1.28                    | 1000             | 0                                    | <0.001  | <0.001           | *            |
| 3-hits         | PB      | 96.31                              | SB      | 31.03                              | 3.10                    | 1000             | 0                                    | <0.001  | <0.001           | *            |
| 3-hits         | Tol2    | 75.27                              | SB      | 31.03                              | 2.43                    | 1000             | 0                                    | <0.001  | <0.001           | *            |
| 4-hits or more | MLV     | 171.73                             | PB      | 43.61                              | 3.94                    | 1000             | 0                                    | <0.001  | <0.001           | *            |
| 4-hits or more | MLV     | 171.73                             | Tol2    | 38.18                              | 4.50                    | 1000             | 0                                    | <0.001  | <0.001           | *            |
| 4-hits or more | MLV     | 171.73                             | SB      | 12.67                              | 13.55                   | 1000             | 0                                    | <0.001  | <0.001           | *            |
| 4-hits or more | PB      | 43.61                              | Tol2    | 38.18                              | 1.14                    | 1000             | 25                                   | 0.025   | 0.026            | *            |
| 4-hits or more | PB      | 43.61                              | SB      | 12.67                              | 3.44                    | 1000             | 0                                    | <0.001  | <0.001           | *            |
| 4-hits or more | Tol2    | 38.18                              | SB      | 12.67                              | 3.01                    | 1000             | 0                                    | <0.001  | <0.001           | *            |

P-values were calculated by bootstrapping and adjusted by FDR for multiple comparisons.

\*P<0.05.

**Supplementary Table S6. Vector comparison of enrichment inside the highest expressed genes**

| Vector1 | Vector2 | Fraction of insertions (vector1) | Fraction of insertions (vector2) | <i>P</i> -value | Adjusted <i>P</i> -value | Significance |
|---------|---------|----------------------------------|----------------------------------|-----------------|--------------------------|--------------|
| MLV     | PB      | 13.56%                           | 14.95%                           | 1.51E-01        | 1.51E-01                 |              |
| MLV     | Tol2    | 13.56%                           | 8.76%                            | 1.85E-07        | 3.70E-07                 | *            |
| MLV     | SB      | 13.56%                           | 9.92%                            | 6.55E-06        | 9.83E-06                 | *            |
| PB      | Tol2    | 14.95%                           | 8.76%                            | 2.08E-11        | 1.25E-10                 | *            |
| PB      | SB      | 14.95%                           | 9.92%                            | 2.78E-10        | 8.33E-10                 | *            |
| Tol2    | SB      | 8.76%                            | 9.92%                            | 1.47E-01        | 1.51E-01                 |              |

*P*-values were calculated by Fisher's exact test and adjusted by FDR for multiple comparisons.

\**P*<0.05.

**Supplementary Table S7. Vector comparison of insertions into enhancer and super-enhancer regions**

| Type           | Vector1 | Fraction of insertions (vector1) | Vector2 | Fraction of insertions (vector2) | Ratio | P-value   | Adjusted P-value | Significance |
|----------------|---------|----------------------------------|---------|----------------------------------|-------|-----------|------------------|--------------|
| Enhancer       | MLV     | 9.65%                            | PB      | 6.27%                            | 1.54  | 4.26E-12  | 5.12E-12         | *            |
| Enhancer       | MLV     | 9.65%                            | Tol2    | 2.12%                            | 4.56  | 7.64E-61  | 1.53E-60         | *            |
| Enhancer       | MLV     | 9.65%                            | SB      | 0.84%                            | 11.43 | 6.03E-149 | 3.62E-148        | *            |
| Enhancer       | PB      | 6.27%                            | Tol2    | 2.12%                            | 2.96  | 2.06E-26  | 3.09E-26         | *            |
| Enhancer       | PB      | 6.27%                            | SB      | 0.84%                            | 7.42  | 5.98E-82  | 1.79E-81         | *            |
| Enhancer       | Tol2    | 2.12%                            | SB      | 0.84%                            | 2.51  | 2.89E-09  | 2.89E-09         | *            |
| Super-enhancer | MLV     | 2.65%                            | PB      | 1.52%                            | 1.74  | 1.38E-05  | 1.66E-05         | *            |
| Super-enhancer | MLV     | 2.65%                            | Tol2    | 0.41%                            | 6.53  | 3.26E-21  | 6.52E-21         | *            |
| Super-enhancer | MLV     | 2.65%                            | SB      | 0.08%                            | 32.67 | 3.17E-52  | 1.90E-51         | *            |
| Super-enhancer | PB      | 1.52%                            | Tol2    | 0.41%                            | 3.76  | 4.82E-09  | 7.23E-09         | *            |
| Super-enhancer | PB      | 1.52%                            | SB      | 0.08%                            | 18.80 | 2.45E-28  | 7.35E-28         | *            |
| Super-enhancer | Tol2    | 0.41%                            | SB      | 0.08%                            | 5.01  | 1.45E-04  | 1.45E-04         | *            |

P-values were calculated by Fisher's exact test and adjusted by FDR for multiple comparisons.

\*P<0.05.



**Supplementary Table S8. Vector comparison of insertions at histone-modified regions**

| Histone modification | Vector1 | Fraction of insertions (vector1) | Vector2 | Fraction of insertions (vector2) | Ratio | P-value   | Adjusted P-value | Significance |
|----------------------|---------|----------------------------------|---------|----------------------------------|-------|-----------|------------------|--------------|
| H3K4me3              | MLV     | 14.40%                           | PB      | 9.74%                            | 1.48  | 1.84E-015 | 2.21E-015        | *            |
| H3K4me3              | MLV     | 14.40%                           | Tol2    | 9.17%                            | 1.57  | 3.76E-016 | 5.64E-016        | *            |
| H3K4me3              | MLV     | 14.40%                           | SB      | 1.02%                            | 14.14 | 1.14E-242 | 6.82E-242        | *            |
| H3K4me3              | PB      | 9.74%                            | Tol2    | 9.17%                            | 1.06  | 3.34E-001 | 3.34E-001        |              |
| H3K4me3              | PB      | 9.74%                            | SB      | 1.02%                            | 9.56  | 8.46E-145 | 2.54E-144        | *            |
| H3K4me3              | Tol2    | 9.17%                            | SB      | 1.02%                            | 9.00  | 1.11E-112 | 2.22E-112        | *            |
| H3K27me3             | MLV     | 1.43%                            | PB      | 1.65%                            | 0.86  | 3.40E-001 | 4.08E-001        |              |
| H3K27me3             | MLV     | 1.43%                            | Tol2    | 3.51%                            | 0.41  | 5.01E-012 | 1.50E-011        | *            |
| H3K27me3             | MLV     | 1.43%                            | SB      | 1.39%                            | 1.03  | 8.86E-001 | 8.86E-001        |              |
| H3K27me3             | PB      | 1.65%                            | Tol2    | 3.51%                            | 0.47  | 9.42E-010 | 1.88E-009        | *            |
| H3K27me3             | PB      | 1.65%                            | SB      | 1.39%                            | 1.19  | 1.97E-001 | 2.96E-001        |              |
| H3K27me3             | Tol2    | 3.51%                            | SB      | 1.39%                            | 2.53  | 1.09E-014 | 6.56E-014        | *            |
| H3K4me3 + H3K27me3   | MLV     | 0.64%                            | PB      | 0.47%                            | 1.37  | 2.24E-001 | 2.24E-001        |              |
| H3K4me3 + H3K27me3   | MLV     | 0.64%                            | Tol2    | 1.73%                            | 0.37  | 2.06E-007 | 4.12E-007        | *            |
| H3K4me3 + H3K27me3   | MLV     | 0.64%                            | SB      | 0.24%                            | 2.65  | 2.67E-004 | 4.00E-004        | *            |
| H3K4me3 + H3K27me3   | PB      | 0.47%                            | Tol2    | 1.73%                            | 0.27  | 1.25E-010 | 3.74E-010        | *            |
| H3K4me3 + H3K27me3   | PB      | 0.47%                            | SB      | 0.24%                            | 1.94  | 2.24E-002 | 2.69E-002        | *            |
| H3K4me3 + H3K27me3   | Tol2    | 1.73%                            | SB      | 0.24%                            | 7.14  | 1.28E-019 | 7.69E-019        | *            |

P-values were calculated by Fisher's exact test and adjusted by FDR for multiple comparisons.

\*P<0.05.

**Supplementary Table S9. Vector Comparison of insertions at the binding sites of regulatory proteins**

| Regulatory protein | Vector1 | Fraction of insertions (vector1) | Vector2 | Fraction of insertions (vector2) | Ratio | P-value   | Adjusted P-value | Significance |
|--------------------|---------|----------------------------------|---------|----------------------------------|-------|-----------|------------------|--------------|
| Brd4               | MLV     | 25.30%                           | PB      | 17.20%                           | 1.47  | 4.23E-28  | 4.23E-28         | *            |
| Brd4               | MLV     | 25.30%                           | Tol2    | 9.37%                            | 2.70  | 1.05E-100 | 2.09E-100        | *            |
| Brd4               | MLV     | 25.30%                           | SB      | 1.46%                            | 17.35 | 0.00E+00  | 0.00E+00         | *            |
| Brd4               | PB      | 17.20%                           | Tol2    | 9.37%                            | 1.83  | 5.84E-32  | 7.01E-32         | *            |
| Brd4               | PB      | 17.20%                           | SB      | 1.46%                            | 11.79 | 1.29E-285 | 3.87E-285        | *            |
| Brd4               | Tol2    | 9.37%                            | SB      | 1.46%                            | 6.43  | 1.63E-96  | 2.44E-96         | *            |
| CTCF               | MLV     | 0.92%                            | PB      | 3.13%                            | 0.29  | 8.03E-19  | 2.41E-18         | *            |
| CTCF               | MLV     | 0.92%                            | Tol2    | 2.86%                            | 0.32  | 1.00E-13  | 1.51E-13         | *            |
| CTCF               | MLV     | 0.92%                            | SB      | 0.94%                            | 0.98  | 9.30E-01  | 9.30E-01         |              |
| CTCF               | PB      | 3.13%                            | Tol2    | 2.86%                            | 1.09  | 4.58E-01  | 5.49E-01         |              |
| CTCF               | PB      | 3.13%                            | SB      | 0.94%                            | 3.33  | 2.09E-22  | 1.25E-21         | *            |
| CTCF               | Tol2    | 2.86%                            | SB      | 0.94%                            | 3.05  | 9.35E-16  | 1.87E-15         | *            |
| Med12              | MLV     | 3.34%                            | PB      | 3.41%                            | 0.98  | 8.81E-01  | 8.81E-01         |              |
| Med12              | MLV     | 3.34%                            | Tol2    | 1.49%                            | 2.25  | 1.38E-09  | 1.65E-09         | *            |
| Med12              | MLV     | 3.34%                            | SB      | 0.37%                            | 9.03  | 1.44E-46  | 4.32E-46         | *            |
| Med12              | PB      | 3.41%                            | Tol2    | 1.49%                            | 2.29  | 2.71E-10  | 4.07E-10         | *            |
| Med12              | PB      | 3.41%                            | SB      | 0.37%                            | 9.20  | 1.79E-49  | 1.07E-48         | *            |
| Med12              | Tol2    | 1.49%                            | SB      | 0.37%                            | 4.01  | 1.86E-11  | 3.72E-11         | *            |
| Med1               | MLV     | 3.94%                            | PB      | 3.91%                            | 1.01  | 9.63E-01  | 9.63E-01         |              |
| Med1               | MLV     | 3.94%                            | Tol2    | 1.69%                            | 2.33  | 9.68E-12  | 1.16E-11         | *            |
| Med1               | MLV     | 3.94%                            | SB      | 0.31%                            | 12.60 | 3.09E-62  | 9.26E-62         | *            |
| Med1               | PB      | 3.91%                            | Tol2    | 1.69%                            | 2.31  | 7.76E-12  | 1.16E-11         | *            |
| Med1               | PB      | 3.91%                            | SB      | 0.31%                            | 12.51 | 1.27E-63  | 7.60E-63         | *            |
| Med1               | Tol2    | 1.69%                            | SB      | 0.31%                            | 5.41  | 3.05E-16  | 6.11E-16         | *            |
| Nanog              | MLV     | 1.66%                            | PB      | 3.14%                            | 0.53  | 1.03E-07  | 1.55E-07         | *            |
| Nanog              | MLV     | 1.66%                            | Tol2    | 0.88%                            | 1.89  | 4.85E-04  | 5.82E-04         | *            |
| Nanog              | MLV     | 1.66%                            | SB      | 0.42%                            | 3.99  | 2.46E-14  | 4.92E-14         | *            |
| Nanog              | PB      | 3.14%                            | Tol2    | 0.88%                            | 3.57  | 1.04E-16  | 3.13E-16         | *            |
| Nanog              | PB      | 3.14%                            | SB      | 0.42%                            | 7.54  | 1.50E-41  | 8.98E-41         | *            |
| Nanog              | Tol2    | 0.88%                            | SB      | 0.42%                            | 2.11  | 1.35E-03  | 1.35E-03         | *            |
| Nipbl              | MLV     | 0.92%                            | PB      | 1.19%                            | 0.77  | 1.58E-01  | 1.58E-01         |              |
| Nipbl              | MLV     | 0.92%                            | Tol2    | 0.45%                            | 2.03  | 6.34E-03  | 7.60E-03         | *            |
| Nipbl              | MLV     | 0.92%                            | SB      | 0.09%                            | 9.90  | 4.44E-14  | 1.33E-13         | *            |
| Nipbl              | PB      | 1.19%                            | Tol2    | 0.45%                            | 2.65  | 3.78E-05  | 7.55E-05         | *            |
| Nipbl              | PB      | 1.19%                            | SB      | 0.09%                            | 12.89 | 2.90E-20  | 1.74E-19         | *            |
| Nipbl              | Tol2    | 0.45%                            | SB      | 0.09%                            | 4.87  | 6.50E-05  | 9.75E-05         | *            |
| Oct4               | MLV     | 1.41%                            | PB      | 2.91%                            | 0.48  | 9.99E-09  | 1.50E-08         | *            |
| Oct4               | MLV     | 1.41%                            | Tol2    | 1.01%                            | 1.39  | 8.74E-02  | 8.74E-02         |              |
| Oct4               | MLV     | 1.41%                            | SB      | 0.45%                            | 3.12  | 1.18E-09  | 2.36E-09         | *            |
| Oct4               | PB      | 2.91%                            | Tol2    | 1.01%                            | 2.87  | 3.40E-12  | 1.02E-11         | *            |
| Oct4               | PB      | 2.91%                            | SB      | 0.45%                            | 6.44  | 2.13E-35  | 1.28E-34         | *            |
| Oct4               | Tol2    | 1.01%                            | SB      | 0.45%                            | 2.25  | 2.80E-04  | 3.36E-04         | *            |
| P300               | MLV     | 4.09%                            | PB      | 4.44%                            | 0.92  | 3.48E-01  | 3.48E-01         |              |
| P300               | MLV     | 4.09%                            | Tol2    | 2.61%                            | 1.56  | 4.27E-05  | 5.13E-05         | *            |
| P300               | MLV     | 4.09%                            | SB      | 0.44%                            | 9.30  | 1.26E-57  | 3.79E-57         | *            |
| P300               | PB      | 4.44%                            | Tol2    | 2.61%                            | 1.70  | 4.48E-07  | 6.71E-07         | *            |
| P300               | PB      | 4.44%                            | SB      | 0.44%                            | 10.11 | 8.64E-67  | 5.18E-66         | *            |
| P300               | Tol2    | 2.61%                            | SB      | 0.44%                            | 5.94  | 6.37E-26  | 1.27E-25         | *            |
| Pol2               | MLV     | 14.88%                           | PB      | 10.10%                           | 1.47  | 9.95E-16  | 9.95E-16         | *            |
| Pol2               | MLV     | 14.88%                           | Tol2    | 5.11%                            | 2.91  | 3.85E-61  | 7.70E-61         | *            |
| Pol2               | MLV     | 14.88%                           | SB      | 0.94%                            | 15.87 | 1.51E-259 | 9.09E-259        | *            |
| Pol2               | PB      | 10.10%                           | Tol2    | 5.11%                            | 1.97  | 8.58E-22  | 1.03E-21         | *            |
| Pol2               | PB      | 10.10%                           | SB      | 0.94%                            | 10.77 | 1.06E-157 | 3.19E-157        | *            |
| Pol2               | Tol2    | 5.11%                            | SB      | 0.94%                            | 5.46  | 4.59E-47  | 6.89E-47         | *            |
| Smc1               | MLV     | 0.88%                            | PB      | 2.58%                            | 0.34  | 3.31E-13  | 6.61E-13         | *            |
| Smc1               | MLV     | 0.88%                            | Tol2    | 2.14%                            | 0.41  | 1.29E-07  | 1.94E-07         | *            |
| Smc1               | MLV     | 0.88%                            | SB      | 0.56%                            | 1.59  | 2.41E-02  | 2.89E-02         | *            |
| Smc1               | PB      | 2.58%                            | Tol2    | 2.14%                            | 1.20  | 1.60E-01  | 1.60E-01         |              |
| Smc1               | PB      | 2.58%                            | SB      | 0.56%                            | 4.64  | 2.58E-25  | 1.55E-24         | *            |
| Smc1               | Tol2    | 2.14%                            | SB      | 0.56%                            | 3.85  | 1.91E-15  | 5.73E-15         | *            |
| Smc3               | MLV     | 0.39%                            | PB      | 1.99%                            | 0.20  | 2.67E-17  | 1.60E-16         | *            |
| Smc3               | MLV     | 0.39%                            | Tol2    | 1.73%                            | 0.22  | 6.00E-12  | 1.20E-11         | *            |
| Smc3               | MLV     | 0.39%                            | SB      | 0.57%                            | 0.69  | 1.50E-01  | 1.79E-01         |              |
| Smc3               | PB      | 1.99%                            | Tol2    | 1.73%                            | 1.15  | 3.51E-01  | 3.51E-01         |              |
| Smc3               | PB      | 1.99%                            | SB      | 0.57%                            | 3.52  | 1.35E-15  | 4.06E-15         | *            |
| Smc3               | Tol2    | 1.73%                            | SB      | 0.57%                            | 3.06  | 4.97E-10  | 7.46E-10         | *            |
| Sox2               | MLV     | 1.51%                            | PB      | 2.83%                            | 0.53  | 6.66E-07  | 9.99E-07         | *            |
| Sox2               | MLV     | 1.51%                            | Tol2    | 0.88%                            | 1.72  | 3.96E-03  | 3.96E-03         | *            |
| Sox2               | MLV     | 1.51%                            | SB      | 0.37%                            | 4.08  | 2.04E-13  | 4.08E-13         | *            |
| Sox2               | PB      | 2.83%                            | Tol2    | 0.88%                            | 3.22  | 1.73E-13  | 4.08E-13         | *            |
| Sox2               | PB      | 2.83%                            | SB      | 0.37%                            | 7.63  | 7.25E-38  | 4.35E-37         | *            |
| Sox2               | Tol2    | 0.88%                            | SB      | 0.37%                            | 2.37  | 3.52E-04  | 4.23E-04         | *            |
| TBP                | MLV     | 1.54%                            | PB      | 1.95%                            | 0.79  | 9.83E-02  | 1.18E-01         |              |
| TBP                | MLV     | 1.54%                            | Tol2    | 1.49%                            | 1.04  | 8.71E-01  | 8.71E-01         |              |
| TBP                | MLV     | 1.54%                            | SB      | 0.17%                            | 8.89  | 5.22E-22  | 1.57E-21         | *            |
| TBP                | PB      | 1.95%                            | Tol2    | 1.49%                            | 1.31  | 7.46E-02  | 1.12E-01         |              |
| TBP                | PB      | 1.95%                            | SB      | 0.17%                            | 11.22 | 5.43E-31  | 3.26E-30         | *            |
| TBP                | Tol2    | 1.49%                            | SB      | 0.17%                            | 8.57  | 1.51E-18  | 3.02E-18         | *            |

P-values were calculated by Fisher's exact test and adjusted by FDR for multiple comparisons.

\*P<0.05

**Supplementary Table S10. Comparison of the findings between previous studies and the current study <sup>a</sup>**

|                                                     | Previous studies <sup>b</sup>                                                                                                    |                                                                                                                                         |                                                      |                                                                                                       | Current study <sup>c</sup>                                                                                   |                                                                                      |                                                                                                                                       |                                                                        |                                                                                                                                  |
|-----------------------------------------------------|----------------------------------------------------------------------------------------------------------------------------------|-----------------------------------------------------------------------------------------------------------------------------------------|------------------------------------------------------|-------------------------------------------------------------------------------------------------------|--------------------------------------------------------------------------------------------------------------|--------------------------------------------------------------------------------------|---------------------------------------------------------------------------------------------------------------------------------------|------------------------------------------------------------------------|----------------------------------------------------------------------------------------------------------------------------------|
|                                                     | MLV                                                                                                                              | PB                                                                                                                                      | Tol2                                                 | SB                                                                                                    | MLV                                                                                                          | PB                                                                                   | Tol2                                                                                                                                  | SB                                                                     | Note                                                                                                                             |
| <b>Gene</b>                                         | Preference for gene regions (42,43)                                                                                              | Preference for gene regions (33,38)                                                                                                     | Preference for gene regions (31,38)                  | Preference for gene regions (33,38)                                                                   | Correlation with genome-wide exon density; Preference for gene regions                                       | Correlation with genome-wide exon density; Preference for gene regions               | Correlation with genome-wide exon density; Preference for gene regions                                                                | Correlation with genome-wide exon density; Preference for gene regions |                                                                                                                                  |
| <b>Insertion hotspot</b>                            | Half of the insertions were in <2% of the genomes (36)                                                                           | NA                                                                                                                                      | NA                                                   | NA                                                                                                    | Strong                                                                                                       | Medium                                                                               | Medium                                                                                                                                | Low                                                                    |                                                                                                                                  |
| <b>Gene expression</b>                              | Strong preference (37)                                                                                                           | Preference (33)                                                                                                                         | NA                                                   | Some preference (33)                                                                                  | Strong preference                                                                                            | Moderate preference                                                                  | Weak preference                                                                                                                       | Weak preference                                                        |                                                                                                                                  |
| <b>TSS</b>                                          | Strong preference; Bimodal pattern <sup>d</sup> (34,37,43)                                                                       | Preference (33,34,38)                                                                                                                   | Preference (31,35,38)                                | No preference (34,39)                                                                                 | Strong preference; Bimodal pattern <sup>d</sup>                                                              | Preference; Bimodal pattern <sup>d</sup>                                             | Preference; Bimodal pattern <sup>d</sup>                                                                                              | No preference                                                          |                                                                                                                                  |
| <b>Histone modifications</b>                        | Strong preference for active marks (34,36,37,41,42), especially for the regions enriched with multiple active modifications (36) | Preference for active modifications (33)                                                                                                | Inverse correlation with H3K27me3 in HeLa cells (31) | Minimum preference for active marks (33)                                                              | Strong preference for super-enhancer regions                                                                 | Preference for super-enhancer regions                                                | Preference for bivalent modification of H3K4me3 and H3K27me3                                                                          | Minimum preference for histone modifications                           | The cell lines analysed for Tol2 were different between the previous study and the current study                                 |
| <b>Developmentally regulated genes <sup>e</sup></b> | NA                                                                                                                               | NA                                                                                                                                      | NA                                                   | NA                                                                                                    | Strong preference for ESC-specific genes                                                                     | Preference for ESC-specific genes                                                    | Preference for inducible genes                                                                                                        | Some preference for inducible genes                                    |                                                                                                                                  |
| <b>DNase I HS</b>                                   | Preference (36); Bimodal pattern <sup>f</sup> (34)                                                                               | Preference (17,33,38)                                                                                                                   | Preference (38)                                      | No preference (38)                                                                                    | Preference; Bimodal pattern <sup>f</sup>                                                                     | Preference; Single peak                                                              | Preference; Single narrow peak                                                                                                        | No preference                                                          |                                                                                                                                  |
| <b>Transcriptional regulators</b>                   | Preference for the binding sites of transcriptional regulators(34); Interaction with BET proteins (41)                           | Preference for the binding sites of transcriptional regulators(34); Interaction with BET proteins (34)                                  | NA                                                   | Weak preference (34)                                                                                  | Strong preference for the binding sites of multiple transcriptional regulators; Bimodal pattern <sup>f</sup> | Preference for the binding sites of multiple transcriptional regulators; Single peak | Preference for the binding sites of transcriptional regulators; Association with ESC-specific transcription factors is weaker than PB | No preference                                                          | Cluster of various transcriptional regulators at the insertion sites is consistent with the preference for super-enhancer region |
| <b>Chromatin architectural proteins</b>             | Preference for the binding sites of CTCF in primary human CD4 <sup>+</sup> T cells (34), HepG2(36), K562 (36)                    | Preference for the binding sites of CTCF in primary human CD4 <sup>+</sup> T cells (34), and Smc1, Smc3, Med1, Med12 in mouse ESCs (33) | NA                                                   | No preference for Smc1, Smc3, Med1, Med12 in mouse ESCs (33)                                          | No preference for CTCF; Preference for Smc1, Smc3, Med1, Med12, Nipbl                                        | Preference for CTCF, Smc1, Smc3, Med1, Med12, Nipbl                                  | Preference for CTCF, Smc1, Smc3, Med1, Med12, Nipbl                                                                                   | No preference for CTCF, Smc1, Smc3, Med1, Med12, Nipbl                 |                                                                                                                                  |
| <b>Other features</b>                               | Some preference for nucleosomal DNA (34)                                                                                         | Local DNA flexibility (35)                                                                                                              | Local DNA flexibility (35)                           | Preference for some repetitive elements (39,40) and zigzag pattern deformability of local DNA (32,44) | NA                                                                                                           | NA                                                                                   | NA                                                                                                                                    | NA                                                                     |                                                                                                                                  |

<sup>a</sup> The numbers in parenthesis correspond to the reference number in the main text. NA, not applicable.

<sup>b</sup> Results obtained from various cells are summarized unless indicated.

<sup>c</sup> Red, new findings; Blue, similar observations were reported previously; however, comparison between the four vectors has not been done or analysis in ESCs has not been reported.

<sup>d</sup> Bimodal pattern indicates that the peak of the insertion was observed upstream and downstream of TSS.

<sup>e</sup> Genes differentially expressed between ESCs and NPCs.

<sup>f</sup> Bimodal pattern indicates that the peak of DNase I HS or enrichment of the binding sites of transcriptional regulators was observed upstream and downstream of the insertion site.

**Supplementary Table S11. Oligonucleotides for splinkerette-PCR and sequencing of vector insertion sites**

| Usage                   | Primer name                 | Sequence                                                          |
|-------------------------|-----------------------------|-------------------------------------------------------------------|
| <b>For Roche GS FLX</b> |                             |                                                                   |
| Splinkerette            | Spl-top                     | CGAATCGTAACCGTTTCGTACGAGAATTCGTACGAGAATCGCTGTCTCTCCAACGAGCCAAGG   |
|                         | SplB-BLT                    | CCTGGCTCGTTTTTTTTGCAAAAA                                          |
| 1st nested-PCR primer   |                             |                                                                   |
| MLV                     | T/DR                        | AGTGTATGTAACTTCTGACCCACTGG                                        |
| Tol2                    | L200-1                      | CTTTTTGACTGTAATAAAAATTGTAAGGAG                                    |
| PB                      | PB5-P1                      | AAGCGGCGACTGAGATGTCTAAATG                                         |
| SB                      | SBR-P1                      | CTAACTGACCTAAGACAGGGAATTTTTAC                                     |
| Splinkerette            | Spl-P1                      | CGAATCGTAACCGTTTCGTACGAGAA                                        |
| 2nd nested-PCR primer   |                             |                                                                   |
| MLV                     | Bal-FLX1                    | CCATCTGTTCCCTCCCTGTCTCAGACTCTTGTGTCATGCACAAAGTAGATGTCC            |
|                         | Bal-FLX2                    | CCATCTGTTCCCTCCCTGTCTCAGCAGCTTGTGTCATGCACAAAGTAGATGTCC            |
|                         | Bal-FLX3                    | CCATCTGTTCCCTCCCTGTCTCAGTACTTGTGTCATGCACAAAGTAGATGTCC             |
| Tol2                    | L200-3-FLX1                 | CCATCTGTTCCCTCCCTGTCTCAGACTATAATACTTAAGTACAGTAATCAAG              |
|                         | L200-3-FLX2                 | CCATCTGTTCCCTCCCTGTCTCAGCAGATAATACTTAAGTACAGTAATCAAG              |
|                         | L200-3-FLX3                 | CCATCTGTTCCCTCCCTGTCTCAGTGAATAATACTTAAGTACAGTAATCAAG              |
| PB                      | V-PB5-P3-FLX1               | CCATCTCATCCCTGCGTGTCTCCGACTCAGACAGTGAAGAGAGAGCAATATTTCAAGAATG     |
|                         | V-PB5-P3-FLX2               | CCATCTCATCCCTGCGTGTCTCCGACTCAGCATAGGAAAGAGAGAGCAATATTTCAAGAATG    |
|                         | V-PB5-P3-FLX3               | CCATCTCATCCCTGCGTGTCTCCGACTCAGTGTGAGAAAGAGAGAGCAATATTTCAAGAATG    |
| SB                      | V-SBR-P3-FLX1               | CCATCTCATCCCTGCGTGTCTCCGACTCAGACAGTAAAAGTGAGTTTAAATGTATTTGGCTAAGG |
|                         | V-SBR-P3-FLX2               | CCATCTCATCCCTGCGTGTCTCCGACTCAGCATAGAAAAGTGAGTTTAAATGTATTTGGCTAAGG |
|                         | V-SBR-P3-FLX3               | CCATCTCATCCCTGCGTGTCTCCGACTCAGTGTCAAAAAGTGAGTTTAAATGTATTTGGCTAAGG |
| Splinkerette            | Spl-P2-FLX (for Tol2 & MLV) | CCTATCCCCTGTTGCGTGTCTCAGTGTACGAGAATCGCTGTCTCTCC                   |
|                         | V-Spl-P2-FLX (for PB & SB)  | CCTATCCCCTGTTGCGTGTCTCAGTGTACGAGAATCGCTGTCTCTCC                   |
| <b>For Illumina GA2</b> |                             |                                                                   |
| Splinkerette            | SPLK-A                      | CGAAGAGTAACCGTTGCTAGGAGAGACCGTGGCTGAATGAGACTGGTGTGACACTAGTGG      |
|                         | SPLK-BLT                    | CCTAGTGTGACACCAGTCTCTAATTTTTTTTTTCAAAAAA                          |
| 1st nested-PCR primer   |                             |                                                                   |
| Tol2                    | Bio-L200-1                  | Biotin-GACGACCTTTTGGACTGTAATAAAAATTGTAAGGAG                       |
| PB                      | Bio-PB5-P1                  | Biotin-GCAACTAAGCGGCGACTGAGATGTCTAAATG                            |
| Splinkerette            | Splink1                     | CGAAGAGTAACCGTTGCTAGGAGAGACC                                      |
| 2nd nested-PCR primer   |                             |                                                                   |
| Tol2                    | P5-L200-4                   | AATGATACGGGACCACCGAGATCTACACTCCAAAAAATAACTTAAGTACAGTAATCAAG       |
| PB                      | P5-PB5pr2                   | AATGATACGGGACCACCGAGATCTACACTCATGCGTCAATTTTACGAGACTATC            |
| Splinkerette            | P7-Splink2                  | CAAGCAGAAGACGGCATAACGAGATGTGGCTGAATGAGACTGGTGTGAC                 |
| Sequencing primer       |                             |                                                                   |
| Tol2                    | L200seq1                    | ACTTAAGTACAGTAATCAAGTAAAATACTCAAGTAC                              |
| PB                      | PB5seq                      | ATGCGTCAATTTTACGAGACTATCTTTC                                      |
| Splinkerette            | Splink2seq                  | GTGGCTGAATGAGACTGGTGTGAC                                          |

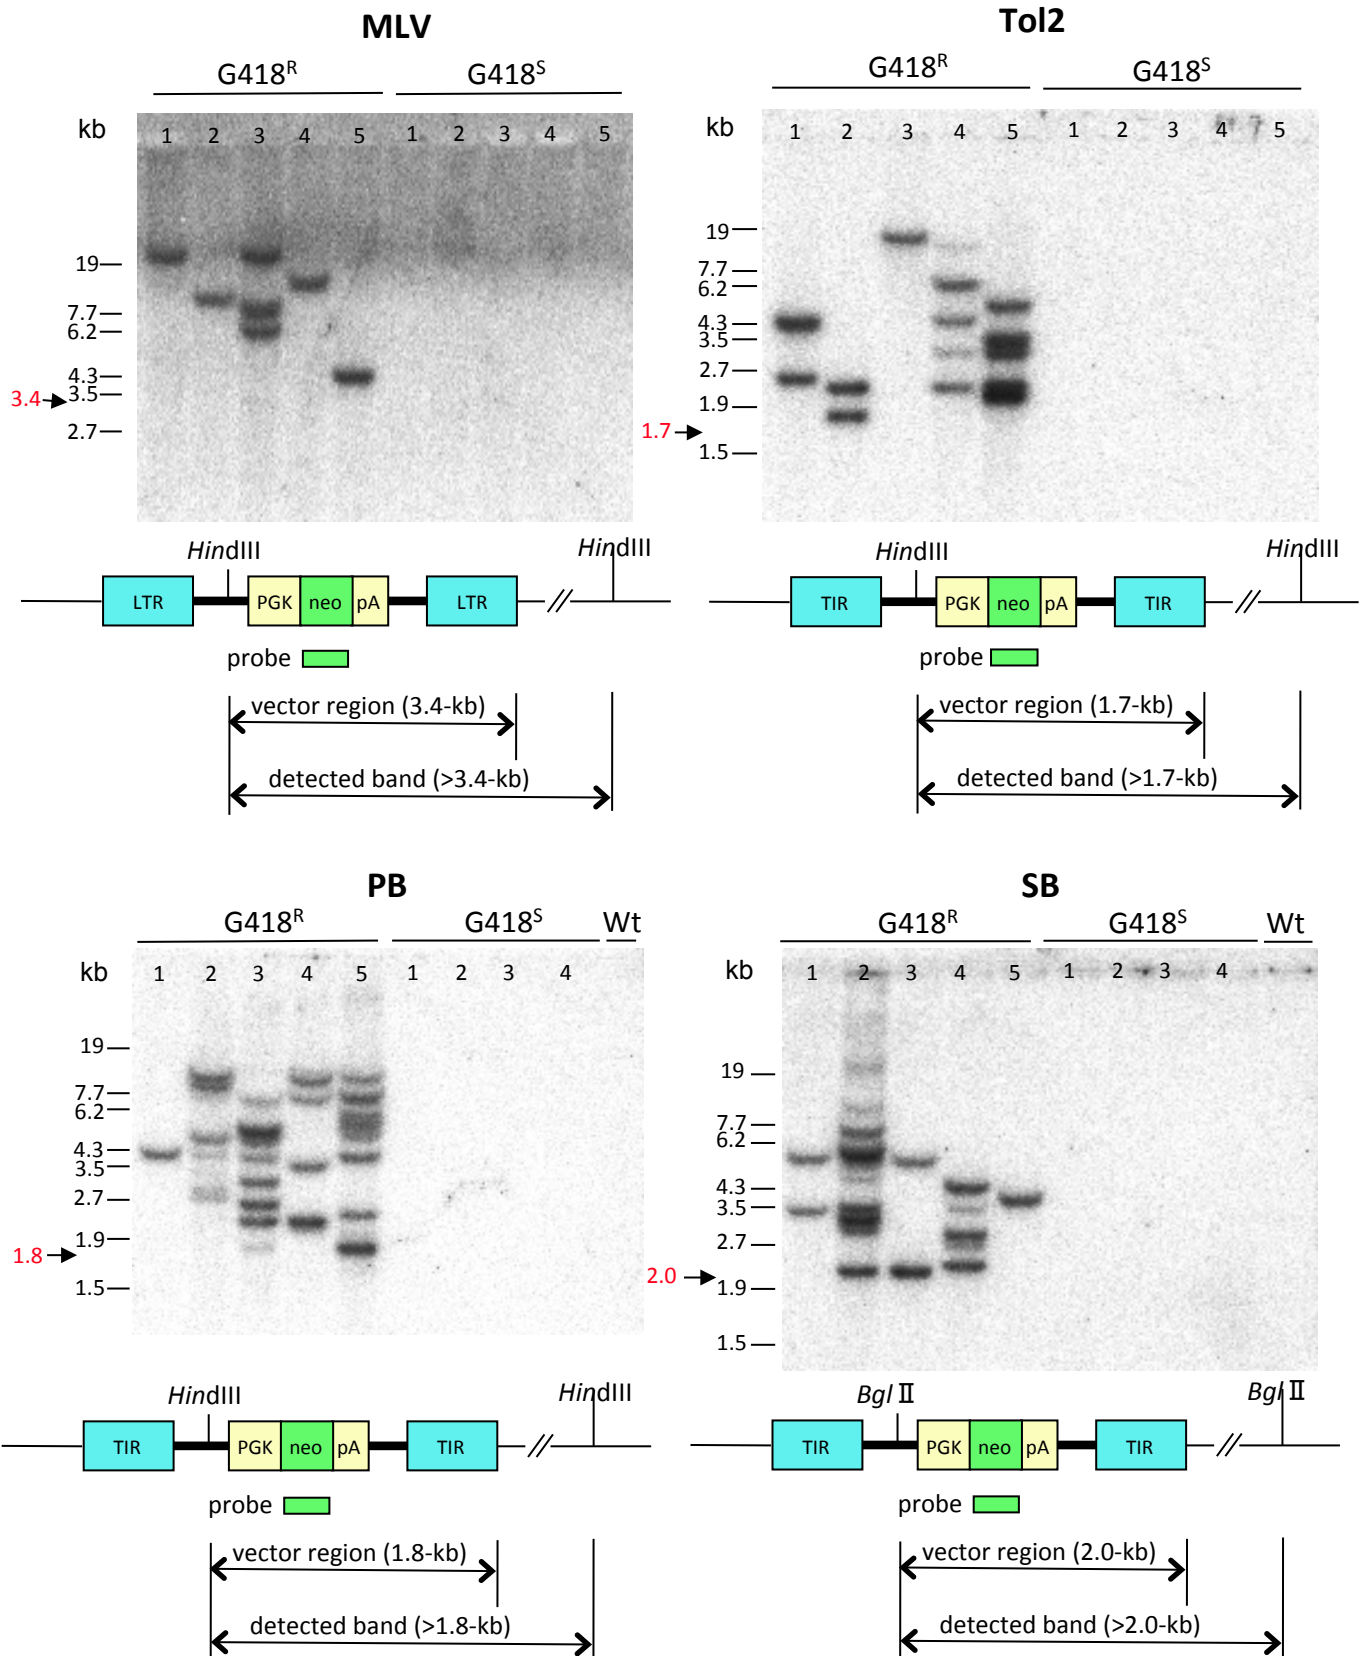

**Supplementary Fig. S1. Copy number of vector DNA in G418-resistant and -sensitive clones**

Copy number of vector DNA was examined by Southern blot analysis in five G418-resistant and four or five G418-sensitive clones for each vector. Each insertion site was detected as a different size of DNA fragment encompassing from the *Hind*III or *Bgl*II site within the vector DNA to a *Hind*III or *Bgl*II site in the flanking region. TIR, terminal inverted repeat; Wt, wild-type ESCs.

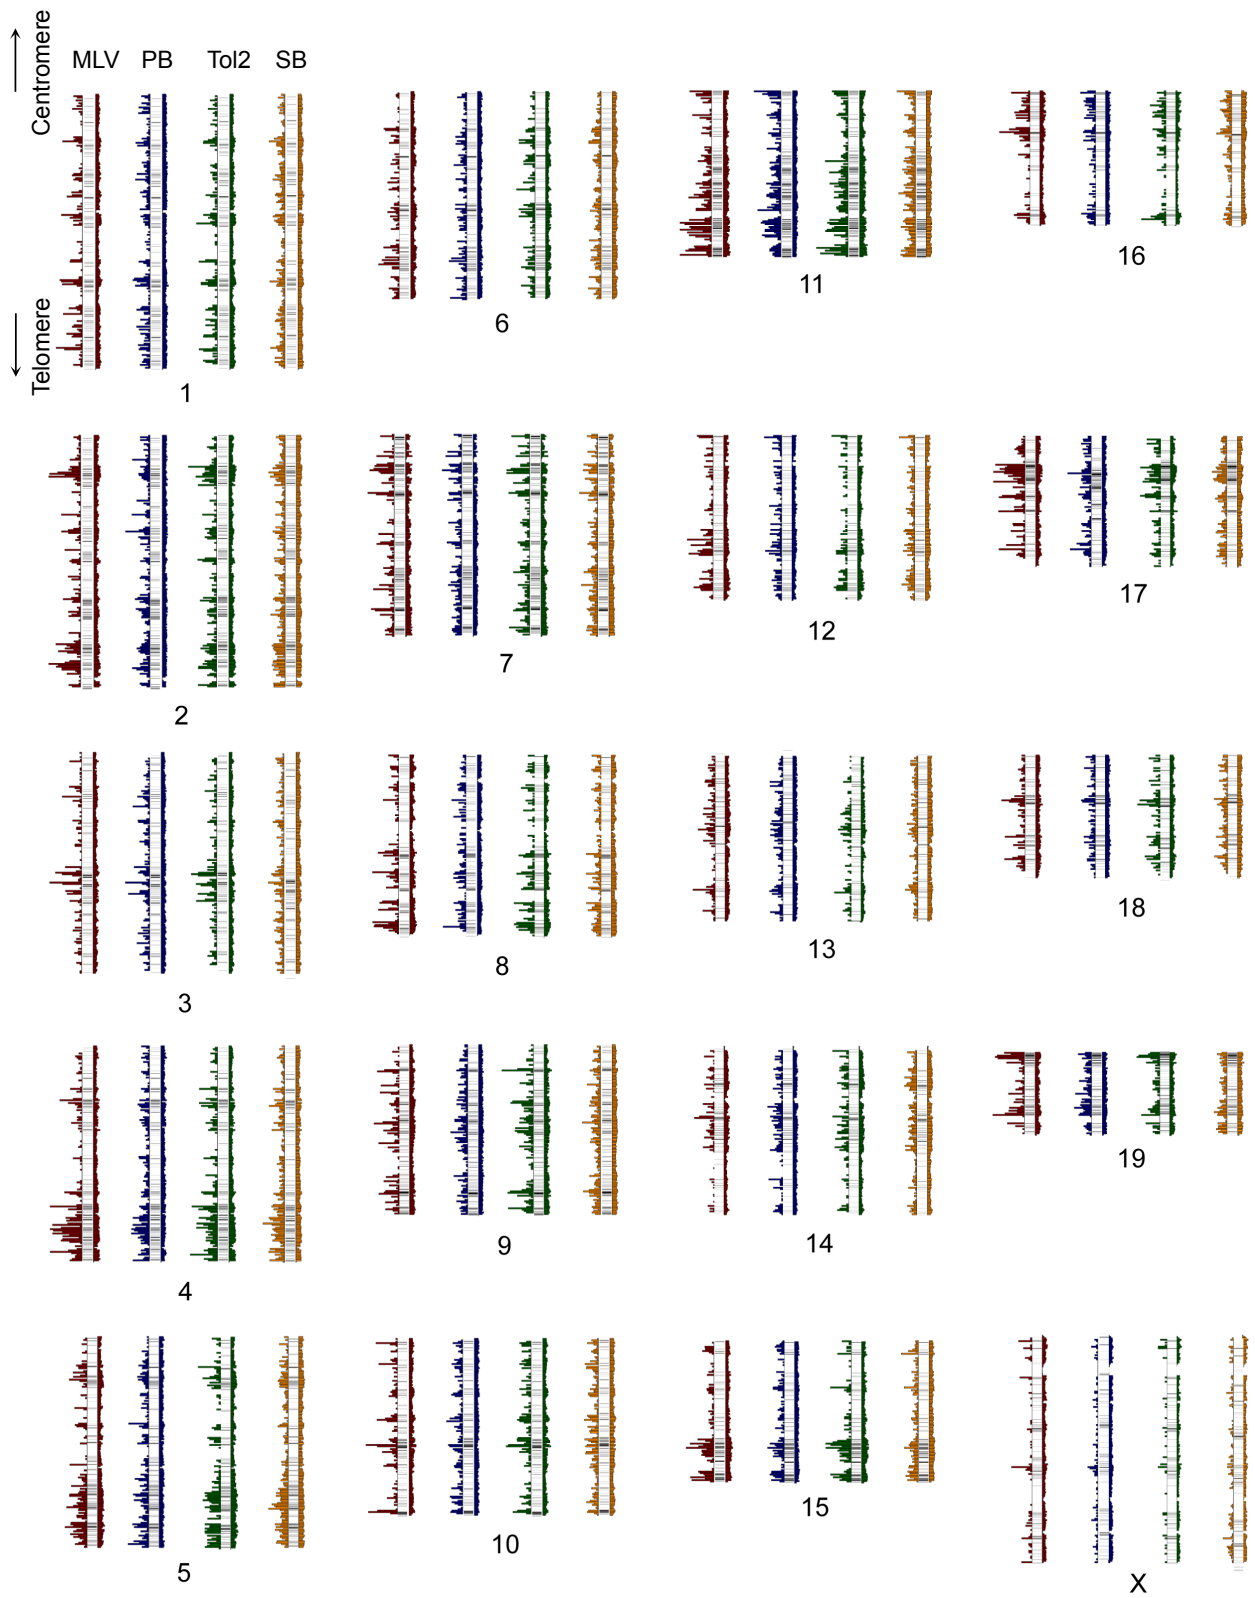

**Supplementary Fig. S2. Genome-wide distribution of vector insertion sites**

Each number indicates chromosome number. The result of chromosome 11 is same as in Fig. 2a. See Fig. 2a legend for details.

**a**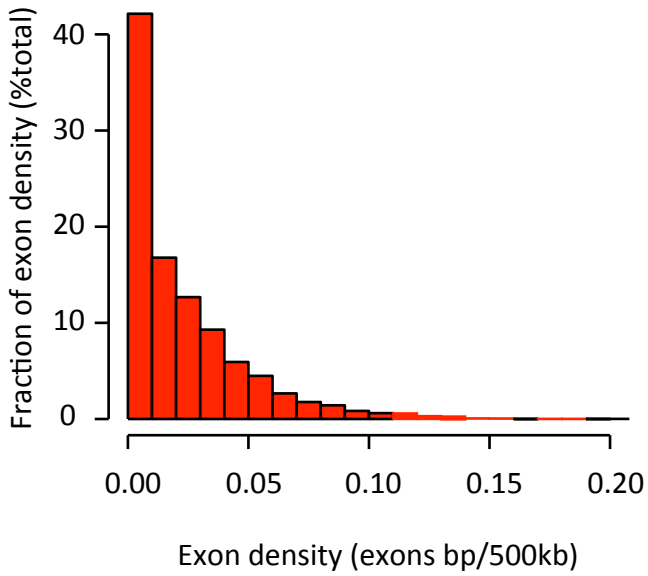**b**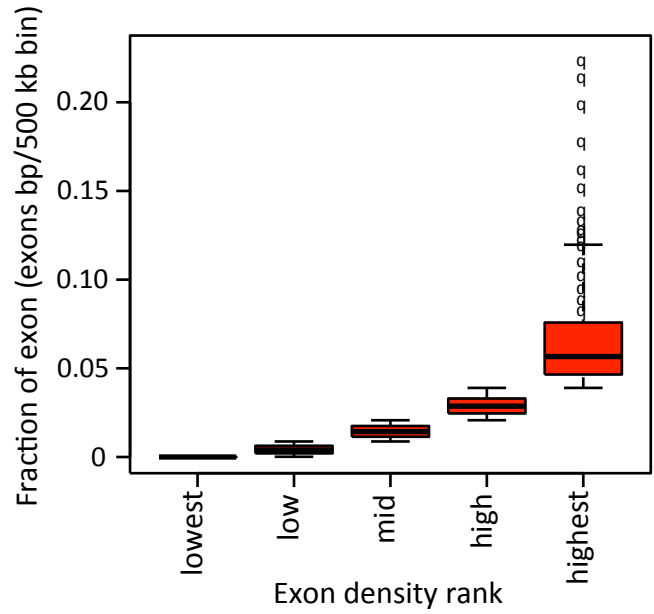**Supplementary Fig. S3. Grouping of genomic regions by exon density**

(a) Histogram of exon density. Genomic regions were divided every 500-kb. Exon density in each 500-kb bin is shown on the X-axis and the corresponding frequency of each exon density is presented on the Y-axis.

(b) Distribution of exon density. Bins of 500-kb genomic regions described in (a) were divided into 5 equal sized groups.

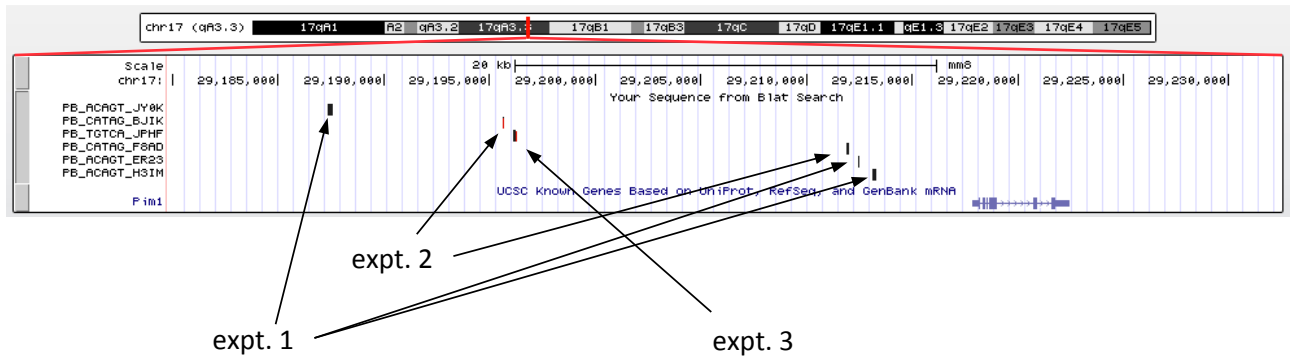

**Supplementary Fig. S4. UCSC genome browser view of a PB insertion hotspot**  
 Expt. 1 – 3 indicate three independent transfections.



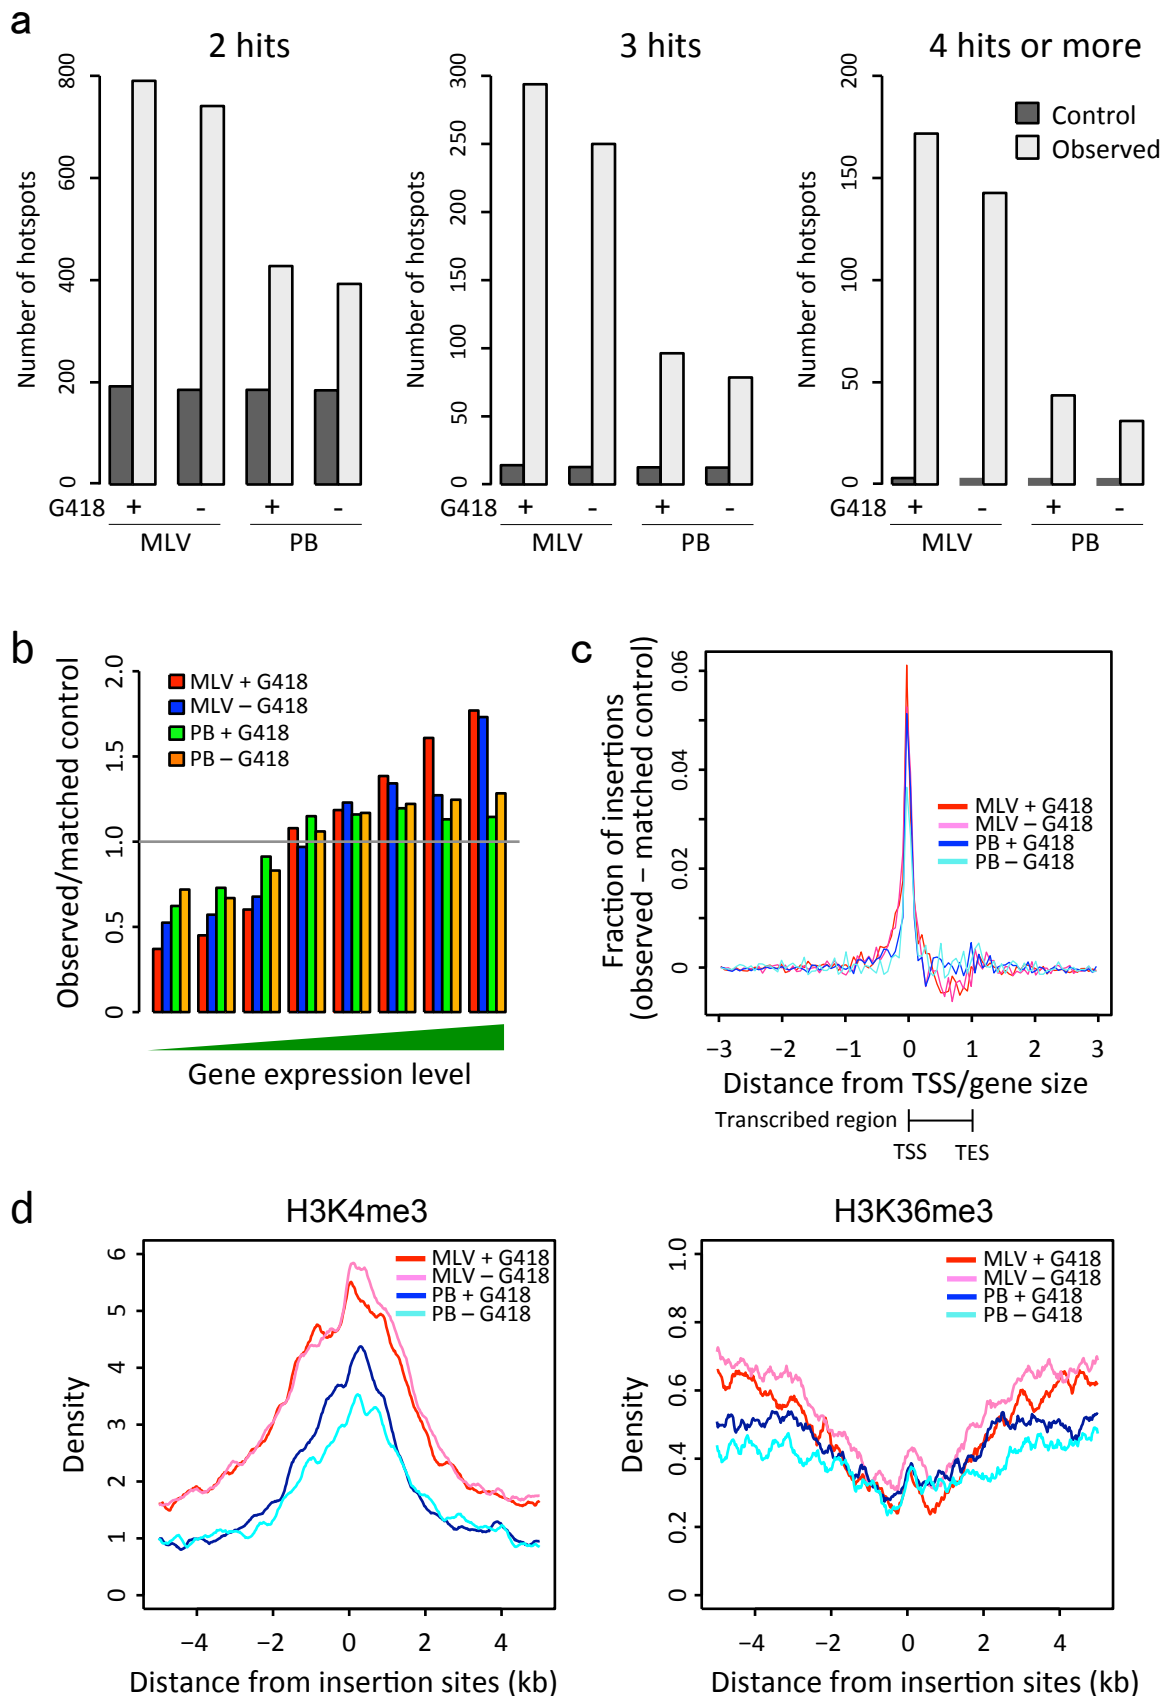

**Supplementary Fig. S5. Comparison between with and without G418 selection analysed with Roche GS FLX.**

(a) Hotspot insertion sites. Numbers of hotspots out of 4,000 insertion events are shown.

(b) Frequency of vector insertion nearby genes ( $\pm 50$ -kb) relative to their expression levels.

(c) Relative distance between TSS and vector insertion sites. TES, transcription end site.

(d) Correlation of insertion sites with histone modifications.

The results are similar between G418 selection and no G418 selection, indicating that silencing of the gene cassette is rare and does not affect the interpretation of the vector insertion preferences.

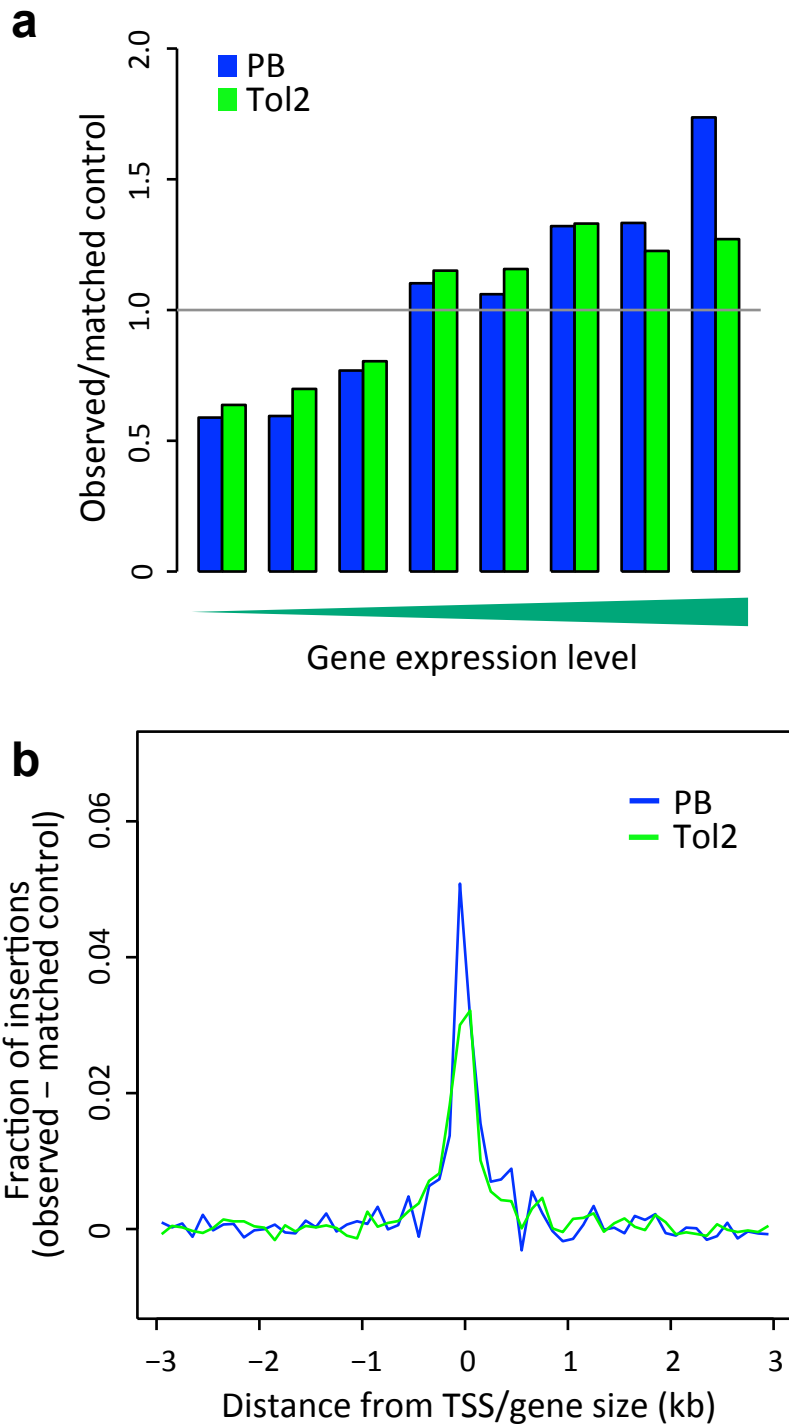

**Supplementary Fig. S6. Insertion preference of PB and Tol2 analyzed with Illumina GA2.**

(a) Frequency of vector insertion nearby genes ( $\pm 50$ -kb) relative to their expression levels.

(b) Relative distance between TSS and vector insertion sites.

The results of both (a) and (b) were similar to the results of Fig. 3b (left) and 3c that were analyzed with Roche GS FLX using the same lot of genomic DNAs, indicating that the difference of the sequence platform and DNA fragmentation methods (*Hind*III digestion or sonication) does not affect our conclusion of insertion site preference.
